FEMSRE 00367

# The photosynthetic machinery in Prochlorophytes: Structural properties and ecological significance

Anton F. Post <sup>a,b,\*</sup> and George S. Bullerjahn <sup>c</sup>

<sup>a</sup> The Interuniversity Institute of Eilat, The H. Steinitz Marine Biology Laboratory, P.O. Box 469, 88103 Eilat, Israel, <sup>b</sup> Division of Microbial and Molecular Ecology, Life Sciences Institute, Hebrew University, Givat Ram, 91904 Jerusalem, Israel, and <sup>c</sup> Department of Biological Sciences, Center for Photochemical Sciences, Bowling Green State University, Bowling Green, OH 43403, USA

(Received 1 July 1993; accepted 13 December 1993)

**Abstract:** The Prochlorophytes are a diverse group of photosynthetic prokaryotes which falls within the cyanobacterial lineage, yet lack phycobilisomes as light harvesting structures. Instead, the Prochlorophytes have a light-harvesting apparatus composed of the higher plant pigments chlorophylls *a* and *b*. This review discusses antenna structures, photosynthetic properties and evolutionary relationships among these bacteria, with focus on the role of photosynthesis in their natural habitat. Most of the available information is obtained from studies on *Prochlorothrix*, the model organism of this group in laboratory studies. Our analysis yields a consensus from studies on two Prochlorophytes, *Prochloron* and *Prochlorothrix*, as to how the thylakoid membrane is organized. Lack of laboratory studies on an abundant third Prochlorophyte, *Prochlorococcus*, does not (yet) allow to include this species in the consensus. Overall, we propose that the structure of the light-harvesting complexes from Prochlorophytes is very different from those of chloroplast systems, and is evolutionarily very ancient. The light-harvesting apparatus is considered to maintain a strong structural and functional association with Photosystem I in both *Prochlorothrix* and *Prochloron*. Photosystem II in *Prochlorothrix* differs from other photosynthetic systems in structural and functional properties of both donor and acceptor sides of its reaction center. A demonstrated capacity for Photosystem I-dependent anoxygenic photosynthesis in *Prochlorothrix* may indicate that there is an increased dependence on cyclic photophosphorylation in these organisms. A description of the natural habitats of the Prochlorophytes has been employed as a jumping board for speculation on the role of the photosynthetic apparatus in occupying, proliferating and surviving in their ecological niches. Prochlorophytes seem to thrive in stable environments of low light, sufficient nitrogen supply and possibly the presence of essential organic solutes.

**Key words:** Prochlorophytes; Chlorophyll *a/b* antenna; Light harvesting; Thylakoid organization; Phylogeny; Ecological physiology

## Introduction

The combination of the photosynthetic pigments chlorophylls (Chl) *a* and *b* is common to

the green algae and the higher plants. These pigments form the core of the light harvesting antenna in these organisms. Nearly all Chl *b* is bound in the light harvesting complex of photosystem II (LHC<sub>II</sub>). Until 1975 one considered the Chl *a/b* antenna as property unique to eukaryotic species, not in the least since the genetic

\* Corresponding author.

information for the apoproteins of the antenna is contained in the nucleus. These so-called *Cab* genes and their protein products show a high degree of homology among the various species [1]. Moreover, eukaryotic antenna structures containing different Chl complements (i.e. from different algal classes) show some degree of structural similarity to the LHC<sub>II</sub> [2,3].

During the last two decades we have witnessed the discoveries of a few photosynthetic prokaryote species that carry Chls *a* and *b*. Their finding has triggered a vivid discussion in commentary articles regarding their possible role in the evolution of green chloroplasts [4–7]. As if anticipating this discussion, these organisms were given the suggestive name of Prochlorophyta (Prochlorophytes) [8] and were even considered to form a separate taxonomic entity with its own subdivision [9]. Ironically, most research papers did not contribute to this discussion, but instead provided much evidence for phylogenetic linkage between the Prochlorophytes and the cyanobacteria (see below). We will maintain the term ‘Prochlorophytes’, meaning prokaryotes containing chlorophylls *a* and *b*. This name makes no reference whatsoever to them being prokaryotic chlorophytes and has no intention to infer any phylogenetic relationship among these species distinguishing them from other photosynthetic prokaryotes. This review focuses mainly on the current knowledge of thylakoid structure, organization and functioning in Prochlorophytes. This focus will be used for a critical review of molecular phylogeny and the position of Prochlorophytes among photosynthetic organisms. Special emphasis will be put on the properties of the prokaryotic Chl *a/b* antenna in comparison to its eukaryotic counterparts. Its features are discussed in relation to the ecological physiology of Prochlorophytes with the aim of providing explanations on how such features may support competitiveness of Prochlorophytes in their natural environments. Some aspects of Prochlorophyte photosynthetic properties and molecular evolution are of a more speculative nature. For this reason we have separated those aspects from the main text and they are being dealt with in separate sections called intermezzo’s.

### History of Prochlorophyte discovery

The Prochlorophyte discoveries were reported from widely different environments and they failed to provide any clue with respect to the actual number of Prochlorophyte species, or the diversity of ecosystems they thrive in. Until now three genera with each one species have been described: *Prochloron didemni*, *Prochlorothrix hollandica* and *Prochlorococcus marinus*. *Prochloron didemni* is found in a symbiotic relationship with marine tunicates in (sub)tropical coastal waters. Upon its discovery [10] it was at first thought to be a marine cyanobacterium containing two distinct Chl types. Identification of these pigments as chlorophyll *a* and *b* and the apparent absence of cyanobacterial antenna phycobilins [11,12] subsequently formed the basis for the creation of a new phylum, the Prochlorophyta [8]. For a decade, *Prochloron* was the only known photosynthetic prokaryote containing Chl *a* and *b*, and by some it was considered a clear indication for the correctness of the theory of the endosymbiotic origin of plant organelles.

The second Prochlorophyte was discovered much along the line that characterized the finding of *Prochloron*. From a series of enrichment experiments aimed at the isolation of characteristic planktonic photosynthetic organisms in a shallow lake in the Netherlands, a light green subculture lacking phycobilins was obtained. Although never published under that name, it was at first identified as *Oscillatoria limnetica*. After establishing the prokaryotic nature of the organisms, together with the presence of Chls *a* and *b*, it became evident that a second Prochlorophyte was found [13]. It differs from *Prochloron* in that it is filamentous, free-living, and thrives in a freshwater environment; thus it was described as the new species *Prochlorothrix hollandica* in the new family of the Prochlorothricaceae, order of the Prochlorales [5]. With the finding of *Prochlorothrix* came the realization that the Prochlorophytes may form a group of related Chl *a/b*-carrying prokaryotes, whose representatives were hitherto overlooked due to lack of criteria for recognition and the apparent difficulties met when trying to bring these organisms into culture.

The discovery of a third Prochlorophyte in part stemmed from work which had described for over a decade the presence of a distinctly different type of Chl in marine waters at various locations in the Atlantic Ocean [14,15]. The occurrence of this Chl species was correlated to the presence of picophytoplankton. It took the on board deployment of a flow cytometer capable of detecting fluorescence emission by individual cells to detect the smallest Prochlorophyte so far [16]. They are free-living photosynthetic coccoid cells, contain divinyl-Chls *a* and *b* and are often the abundant species in picophytoplankton of marine surface waters. After its isolation this Prochlorophyte was named *Prochlorococcus marinus* [17]. The discovery of this organism will most probably effect a shift in the Prochlorophyte research focus away from the evolutionary origin of the chloroplast towards characterization of the photosynthetic apparatus in an ecologically important group of organisms.

#### *Cell structure and morphology of Prochlorophytes*

Light and electron microscopy studies of the Prochlorophyte (ultra)structure have clearly established the prokaryotic nature of the three Prochlorophytes. The various Prochlorophytes differ considerably in cell size. *Prochloron* is found as coccoid cells with a diameter of 9–30  $\mu\text{m}$  [18]. The spherical cells of *Prochlorococcus* are 1.2–1.6  $\mu\text{m}$  in length and 0.6–0.8  $\mu\text{m}$  in width [17]. The only filamentous species, *Prochlorothrix*, are cells of 3–10  $\mu\text{m}$  in length and 0.5–1.5  $\mu\text{m}$  in diameter during exponential growth [13]. The filaments or trichomes consist of at least five cells, but may increase to up to 100 cells or more in undisturbed cultures. In all three species, the thylakoid membranes lack the phycobilisomes characteristic for cyanobacteria, and the membranes are found spread in the cytoplasm, often running parallel to one another and to the cell wall. Thin sections show modest membrane stacks seen as parallel arrays of paired membranes [19,20], but it is difficult to distinguish well defined stacked granal and unstacked stromal membranes characteristic of higher plant chloroplasts. The pairing of photosynthetic membranes in Prochlorophytes as op-

posed to the situation in cyanobacteria has been attributed to the presence of Chl *b* [5], the presence of a LHC type antenna [19] and the absence of phycobilisomes [5].

Prochlorophytes further contain inclusion bodies typical of (cyano)bacteria. Carboxysomes, which contain the enzymes essential for efficient photosynthetic carbon fixation, have been shown to occur in *Prochloron* [21–23], in *Prochlorothrix* [24,25] and in *Prochlorococcus* [16]. Gas vacuoles were found at the poles of the longitudinal cells in the *Prochlorothrix* filaments [25], but their low number does not seem to provide buoyancy capability. The cell wall itself bears great similarity to that of cyanobacteria. Transmission electron micrographs clearly show a cytoplasmic membrane, a periplasmic space, an outer membrane and an outer sheath in all three species [9,13,16,17,23,25]. In summary, Prochlorophytes are morphologically more similar to cyanobacteria than to chloroplasts with limited thylakoid stacking being the only exception.

As cell morphology already suggested, the macromolecular building blocks of the Prochlorophyte cell bear much similarity to those of cyanobacteria. On the outer cell surface of *Prochlorothrix* one finds an abundant S-layer protein, which binds the carotenoid zeaxanthin [26]. This protein has only been observed and characterized for *Prochlorothrix* until now, although a similar carotenoid-protein configuration may exist in *Prochloron* based on the observation that *Prochloron* secretes zeaxanthin into media and buffers used during physiological determinations [27]. An antibody raised against this S-layer protein [26] recognizes proteins of similar molecular mass in *Synechococcus* and *Synechocystis* (Lindell and Post, unpublished results). The cell wall contains a multilayered A1- $\gamma$ -type peptidoglycan in both *Prochloron* [28,29] and *Prochlorothrix* [30]. Such an outer sheath is very similar to that found in Gram-positive bacteria and cyanobacteria. Prochlorophyte membranes consist of four major lipid components, monogalactosyl-diacylglycerol, digalactosyl-diacylglycerol, sulfoquinovosyl-diacylglycerol and phosphatidylglycerol, but no phosphatidylcholine, which is specific for the green chloroplast [31–34]. Like cyanobacteria,

Prochlorophytes contain monoglucosyl-diacylglycerol, their overall fatty acid compositions are similar [31–34], and so are the buoyant densities of both the thylakoids and the cytoplasmic membrane [27]. Major fatty acids in *Prochloron* and *Prochlorothrix* are 14:0, 14:1 $\omega$ 5, 16:0, 16:1 $\omega$ 7 and two novel fatty acids unique to *Prochlorothrix*: 16:1 $\omega$ 12 (hexadec-4-anoic acid) and a 16:2 isomer [31]. The carboxysomes of Prochlorophytes are membraneless [21] protein structures which contain the enzymes involved in CO<sub>2</sub>-assimilation and the CO<sub>2</sub>-concentrating mechanism [22–24,37] as we know them from cyanobacteria [38]. The DNA is generally found in the central regions of the cell surrounded by the thylakoid membranes [9,16,23]. Genome sizes of *Prochloron* and *Prochlorothrix* have been estimated at 3.5–4.0 × 10<sup>9</sup> basepairs [35,36], while the GC composition of *Prochloron* and *Prochlorothrix* DNA is between 40 and 50 percent [9,36].

#### *Phylogeny and molecular genetics*

If one reviews the literature on the Prochlorophytes, it becomes clear that taxonomic classification and the inferring of relationships between organisms is not clear-cut. Some researchers have been eager to show a direct relationship between Prochlorophytes and the chloroplast, whereas others were determined to place them among the cyanobacteria. The underlying problem in such exercises lies both in the danger of overemphasizing one aspect while belittling others and in the import of externally imposed bias into the judgement of a certain property. Study of gene homology is presently considered the most powerful tool for taxonomic and phylogenetic purposes. Partial 5S rRNA [39] and later 16S rRNA sequences [40] established a position for *Prochloron* among the cyanobacteria, distant from other eubacteria and the chloroplast. However, these findings have also been used to correctly support alternative phylogenies positioning *Prochloron* as “comparatively little modified descendant of the common ancestor of blue-green algae and chloroplasts” [41]. The only sequences known for all three Prochlorophytes are partial sequences of the genes encoding 16S rRNA and DNA-depen-

dent RNA polymerase, and these have been employed for phylogenetic study [40,42–44]. This work places the Prochlorophytes as a polyphyletic group in the cyanobacterial radiation, and the results from these studies led to the conclusion that Chl *b* emerged more than once in the evolution of photosynthetic organisms [43].

Of the three bacteria, the most sequence information is available for *Prochlorothrix* and this has been used for phylogenetic comparisons to other phototrophs as well. The cloned genes analyzed mostly encode different components of the photosynthetic apparatus. To date, the following gene sequences are available: *psbA*, encoding the D1 protein of PS<sub>II</sub> [45], *psbB*, encoding the PS<sub>II</sub> Chl-protein CP47 [46]; *psbH*, encoding the 10-kDa PS<sub>II</sub> phosphoprotein [47]; *petBD*, encoding apocytochrome *b*<sub>6</sub> and subunit 4 of the cyt *b*<sub>6</sub>/*f* complex [47]; *petE*, encoding plastocyanin (Seeburg and Bullerjahn, unpublished results); and *rbcLS*, encoding the subunits of rubisco, ribulose biphosphate carboxylase/oxygenase [48,49]. While many of these sequence analysis studies support a close affinity of *Prochlorothrix* to the cyanobacteria, analysis of the *psbA* gene product revealed that both the *Prochlorothrix* and chloroplast homologs lack a seven amino acid domain at the C-terminal end, which is found in all cyanobacterial *psbA* sequences [45] and in the *Prochloron psbA* sequence [50]. This domain is pivotal in the assignment of the *psbA* sequence as more homologous to either the cyanobacteria or the green chloroplast [51]. In combination with other characters, one can ascribe evolutionary significance to the different primary structures of the D1 protein [50]. All other gene sequences and their operon structure reflect that *Prochlorothrix* falls within the cyanobacteria. Additionally, while *rbcLS* are linked in cyanobacteria and *Prochlorothrix*, in eukaryotes *rbcL* is a plastid gene and the RuBisCo small subunit is encoded by a nuclear multigene family [48,49]. Chloroplasts also have a conserved operon transcription unit of *psbBHp<sub>etBD</sub>*, but in *Prochlorothrix* and cyanobacteria only *petBD* are linked in an operon [47]. Sequence data available on the *atpBE* operon, encoding the  $\beta$  and  $\epsilon$  subunits of the thylakoid CF1 complex, further support the positioning of

*Prochloron* within the cyanobacteria [52]. However, these authors recognized a bias against the AT-rich chloroplast plastid when constructing phylogenetic trees of Prochlorophytes, cyanobacteria and the chloroplast [52]. Finally, the *psbO* gene of *Prochloron* has recently been cloned (C. Howe, personal communication). This gene encodes the extrinsic manganese stabilizing protein, MSP, involved in the oxidizing side of PS<sub>II</sub>.

All these data together allow us to position the Prochlorophytes with confidence outside of the chloroplast lineage, but more information on *Prochlorococcus* and *Prochloron* is necessary to establish their relationship to one another within the cyanobacterial radiation. While it has been stated that the Prochlorophytes are a diverged polyphyletic group, some evidence has accumulated to suggest that the apoproteins carrying the Chl *a/b* antenna in *Prochloron* and *Prochlorothrix* are structurally similar [53], and thus that the antennae may share a common origin. A major emphasis of this review is to provide insight into the structure and physiological properties of the Prochlorophyte photosynthetic apparatus and to relate these to photosynthetic properties which support Prochlorophyte proliferation in their natural environment. Particular emphasis will be a detailed discussion of the antenna/reaction center interactions, which so far appear to be unique among photosynthetic systems.

#### **Intermezzo: Prochlorophytes, phylogeny and the origin of the plastid**

To date, phylogenetic studies showing Prochlorophytes as being scattered among the cyanobacteria have prompted the theory that Chl *b* arose multiple times during the evolution of phototrophs. Limited sequence data, immunological studies on the Chl *a/b* antenna apoproteins and Chl *a/b* ratios, among other things, show that the antenna of *Prochlorothrix* is structurally different from LHC<sub>II</sub> and likely has a separate evolutionary origin. While no data are available on the *Prochlorococcus* antenna so far, the *Prochloron* and *Prochlorothrix* antenna appear to share a common origin. This observation shows

that the phylogenetic studies among Prochlorophytes, between Prochlorophytes and cyanobacteria, and between Prochlorophytes and the green chloroplast, do not necessarily lead to foregone conclusions. Two points have to be experimentally addressed in this context.

- (i) If the Chl *a/b* antenna is found to display a high degree of homology among the Prochlorophytes, then we have to consider the possibility that Prochlorophytes do after all form a monophyletic group. In that case, the rRNA clock of Prochlorophyte evolution apparently runs at a different pace than its cyanobacterial counterpart.
- (ii) The odds are that Prochlorophytes are not related to the progenitor of the green chloroplast, based on studies of gene homology, thylakoid composition and structure, and genome size. However, also here the last word has not been spoken. The endosymbiosis may have caused a loss of the prokaryotic antenna and a concurrent import of the nucleus encoded LHC<sub>II</sub>-like antenna apoproteins. The genome size of a Prochlorophyte endosymbiont would be rapidly reduced to plastid size due to gene transfer to the host and the loss of redundant genes. Furthermore, a problem remains in explaining the overall high AT content of organellar DNA, while photosynthetic prokaryotes are, by comparison, more GC-rich. It has been argued that the AT bias has arisen following endosymbiosis [52,54].

#### *Photosynthetic apparatus of the Prochlorophytes*

The thylakoid complexes involved in light harvesting, charge separation and electron transport have been characterized in some detail in *Prochloron*, but the structure and dynamics of the photosynthetic mechanism are best understood for *Prochlorothrix*. For *Prochlorococcus* little is currently known, but some initial observations suggest that this species has similar properties as found in the other Prochlorophytes. Below we describe the relevant characteristics of the photosynthetic complexes which identify these bacteria as structurally and possibly functionally distinct from the green chloroplast and phycobilisome-

Table 1  
Pigment composition of the Prochlorophytes

| Organism               | major carotenoid                                                       | Chl <i>a/b</i> ratio (cells) | Chl <i>a/b</i> ratio (antennae) |
|------------------------|------------------------------------------------------------------------|------------------------------|---------------------------------|
| <i>Prochloron</i>      | $\beta$ -Carotene, zeaxanthin, cryptoxanthin, echinenone, mutatochrome | 4–7                          | 2.4                             |
| <i>Prochlorothrix</i>  | $\beta$ -Carotene, zeaxanthin                                          | 8–9                          | 2.5                             |
| <i>Prochlorococcus</i> | $\alpha$ -Carotene, zeaxanthin                                         | < 1–2 <sup>a</sup>           | ?                               |
| Chloroplasts           | Lutein, violaxanthin, zeaxanthin, neoxanthin, $\beta$ -carotene        | 2–3                          | 1.4                             |

Data compiled from references cited in text [7–9,14–15,43–48].

<sup>a</sup> Pigments are the divinyl-chlorophylls *a* and *b*.

containing organisms. The most obvious feature of the Prochlorophytes is the presence of Chl *b* in addition to Chl *a*. While Chl *a* is an essential component mediating both light-harvesting and electron transport functions in all oxygenic phototrophs, Chl *b* is a pigment dedicated solely to light-harvesting. Chl *a/b* pigment–protein complexes, dedicated to light-harvesting, will henceforth be referred to as antenna complexes, different from the core Chl *a* complexes that comprise Photosystems I (PS<sub>I</sub>) and II (PS<sub>II</sub>).

#### Photosynthetic pigments

Table 1 presents the composition of the Chl and the carotenoid pigments in *Prochloron* [11, 12,27,55,56], *Prochlorothrix* ([13]; Post and Sukenik, unpublished results) and *Prochlorococcus* [16,57]. *Prochlorococcus* is unique among this group in the fact that it contains divinyl Chl *a* [16]. Further study of the Chls showed that not only do these cells contain divinyl Chl *a*, but also divinyl Chl *b* [57]. A characteristic feature of the divinyl Chls *a* and *b* is seen from the blue absorption maximum, which is red-shifted 8–10 nm. The Chl *a/b* ratios in *Prochloron* [11,56,58–60] and *Prochlorothrix* [13,61] are in general higher

than those found in the chloroplast of higher plants [61]. In contrast, *Prochlorococcus* maintains an extremely low Chl *a/b* ratio of < 1 in natural populations and in cultured isolates [16]. These high Chl *b* contents raise some important questions with respect to Chl *a/b* ratios in the light harvesting antenna(e) and even the possibility of a light harvesting antenna carrying (virtually) only Chl *b*. No detailed studies of the carotenoid composition of *Prochlorothrix* and *Prochlorococcus* have been reported. The carotenoids apparently do not contribute to light interception in antenna structures and likely serve to protect the cells from photoinhibitory damage. All three Prochlorophytes have a carotenoid composition distinct from chloroplasts of green algae or higher plants [63]. There is no evidence that a xanthophyll cycle as found in green chloroplasts [64] operates in the Prochlorophytes.

#### The light harvesting antenna

An early study concluded that the Chl *a/b* antenna in *Prochloron* is spectrally and electrophoretically indistinguishable from that of the chloroplast [56]. Subsequent research on *Prochloron* and *Prochlorothrix* indicates that prokaryotic Chl *a/b* antennae are probably different in structure from their eukaryotic counterparts. The Chl *a/b* antenna in *Prochloron* is bound to a 34-kDa polypeptide [65,66]. For *Prochlorothrix* three polypeptides of 30, 33 and 35 kDa molecular mass could be identified in the Chl *a/b* antenna [67,68]. The antenna polypeptides of both *Prochloron* and *Prochlorothrix* are hydrophobic intrinsic thylakoid proteins and their molecular masses suggest that they may be very different from LHC<sub>II</sub> apoproteins [68]. The antenna proteins appear to form a small, homologous family of structurally related polypeptides as judged from immunological studies; an antibody prepared against the *Prochlorothrix* 30-kDa antenna apoprotein cross-reacted with two additional *Prochlorothrix* proteins of 33 and 35 kDa, and to the major 34-kDa antenna apoprotein from *Prochloron* [53]. The antibody did not cross-react with the chloroplast LHC<sub>II</sub> apoproteins, and antibodies against LHC<sub>II</sub> failed to identify these *Prochloron* and *Prochlorothrix* antenna apoproteins

[53,66]. These were the first data to suggest that the Prochlorophyte antenna is structurally dissimilar to that of the green chloroplast. The antibody to the 30-kDa *Prochlorothrix* antenna protein was used to retrieve immunopositive  $\lambda_{ZAP}$  clones encoding fragments of the antenna polypeptides (Bullerjahn, Krugh and Evans, unpublished results). Sequence analysis also indicated that these proteins are structurally dissimilar from the LHC proteins (*Cab* polypeptides) of chloroplast systems; currently it is unclear whether the antenna proteins have evolved independently from the LHC polypeptides encoded by the plant and algal *Cab* multigene family [1].

Pigment analysis of purified antenna complexes yields a relatively high Chl *a/b* ratio in comparison to the major green chloroplast antenna, LHC<sub>II</sub> (see e.g. [69]). The antenna complex of *Prochloron* has been shown to have an *a/b* ratio of 2.4 [66], whereas a ratio of 2.5 has been reported for *Prochlorothrix* [68]. Overall, these ratios account for the high *a/b* ratio of whole cells as compared to green algae and higher plants (see Table 1). Circular dichroism (CD) studies on the purified pigment-protein complexes also indicate that the organization of Chl *b* molecules is different than in LHC<sub>II</sub>, as the negative CD band at 470 nm ascribed to trimeric Chl *b* is absent in the *Prochlorothrix* antenna [70].

Unlike the situation in higher plants, there is growing evidence that a very significant fraction of the Prochlorophyte antenna has a structural and functional association with PS<sub>I</sub>. A number of papers from five separate laboratories have reported that the bulk of the antenna apoproteins and Chl *b* both co-purify with PS<sub>I</sub> and that Chl *b* transfers excitation energy efficiently to PS<sub>I</sub> in *Prochloron* and *Prochlorothrix* [36,56,66–68,71–73]. One research group has claimed that the antenna is largely bound to PS<sub>II</sub> particles after solubilization in Zwittergent 14 [74]. The use of this harsh detergent [75] was previously recognized to strip the Chl *a/b* antenna away from PS<sub>I</sub> [76]. Furthermore, different publications cite different protein compositions for the Chl *a/b* antenna (compare [74] with [76,77]). There is evidence that the 33-kDa antenna apoprotein protein of *Prochlorothrix* is largely associated with

PS<sub>II</sub> [67]. In sum, while the precise partitioning of these antenna proteins in the photosynthetic membrane is currently not fully understood, it is clear that the overall arrangement of the *Prochlorothrix* antenna is quite different from that in green chloroplasts. Characterization of the Chl *a/b* antenna as being a PS<sub>I</sub> or PS<sub>II</sub> antenna is less straightforward than in green chloroplasts. The picture emerges that, functionally, energy harvested by the Chl *a/b* antenna is delivered to both photosystems, whereas its structural association is not fully resolved. How the antenna organization may contribute to the phototrophic metabolism of the Prochlorophytes will be addressed later in this section. No detailed information is as yet available on the structure and organization of the light harvesting Chl *a/b* antenna in *Prochlorococcus*. Initial analysis of fractionated thylakoids showed that not all *Prochlorococcus* strains have abundant proteins in the 30–35-kDa range, which could be candidate antenna proteins (Post and Thomas, unpublished results). Moreover, given the very low Chl *a/b* ratio of *Prochlorococcus* [16,17], we can expect either a different organization of the (divinyl) Chl *a* and *b* in its antenna or even the presence of a different antenna type.

Freeze-etch electron microscopy of *Prochlorothrix* and *Prochloron* membranes demonstrates that there is some degree of partitioning between PS<sub>I</sub> and PS<sub>II</sub> centers in the thylakoid membrane [19,20]. This feature, termed lateral heterogeneity, is a widespread feature of chloroplast systems in which the PS<sub>II</sub> centers are located in the stacked, granal membranes, while PS<sub>I</sub> is found in the unstacked, stromal thylakoids. A notable observation from these studies is that the particles of the *Prochloron* and *Prochlorothrix* EF<sub>s</sub> (exoplasmic fracture face of stacked thylakoid membrane) fracture face, which have been described as PS<sub>II</sub> plus antenna particles, are about 30% smaller than those seen in green chloroplasts [19,20]. Overall, EF<sub>u</sub> (exoplasmic fracture face of non-stacked thylakoid membrane) EF<sub>s</sub> and PF<sub>u</sub> (protoplasmic fracture face of non-stacked thylakoid membrane) contain smaller particles than those found in either chloroplasts or cyanobacteria. Hence assigning pigment-protein complexes

to the various freeze fracture particles in Prochlorophytes is uncertain, especially since the ratio of  $PF_s$  (protoplasmic fracture face of stacked thylakoid membrane) to  $EF_s$  particles is far lower in Prochlorophytes than in green chloroplasts [19,20]. However, we would like to note that  $EF_u$  and  $EF_s$  particles in *Prochlorothrix* and *Prochloron* are significantly smaller in diameter than their chloroplast counterparts. Whereas  $EF_s$  particles have been correlated to the presence of  $PS_{II}^\alpha + LHC_{II}$  and  $EF_u$  to  $PS_{II}^\beta$  stripped of its antenna (see e.g. [78,79]), a similar interpretation seems troublesome for Prochlorophytes although it has been attempted [80]. Transmission electron microscopy of *Prochlorothrix* and *Prochloron* membranes revealed that while some degree of membrane appression is evident, the degree of stacking is less widespread than in chloroplast thylakoids [9,13,16,21,53].

#### **Intermezzo: prokaryotic versus eukaryotic Chl *a/b* antenna**

A fundamental question which remains concerns the relationship of the Prochlorophyte antenna to other antenna types seen in chloroplasts and cyanobacteria. Current phylogenetic data suggest that Chl *b* evolved more than once, even among the Prochlorophytes. An argument in favor of a monophyletic origin for the Prochlorophyte antenna comes from work demonstrating immunological relationships between the *Prochloron* and *Prochlorothrix* antenna apoproteins [53], and their functional associations with  $PSI$  [66–68,71–73].

The discovery of *Prochloron* and *Prochlorothrix* has led to several studies aimed at understanding the structure and dynamics of the photosynthetic apparatus. Such work has provided a great deal of information on the function of the antennae complexes and their relationship to the reaction centers. One conclusion we have drawn from the accumulated data is the apparent lack of a chloroplast  $LHC_{II}$ -like complex in these bacteria. In contrast, the major antenna appears to have a strong structural and functional coupling to  $PS_I$ , and the characterization of the isolated pigment-proteins suggests profound differences between  $LHC$  and the Prochlorophyte antennae. Antenna apoproteins, immunological

relationships among antenna proteins, Chl *a/b* ratio, Chl organization within the antenna, energy transfer etc. all distinguish this antenna type from its eukaryotic counterparts. These structural and functional differences are particularly noteworthy as several papers have independently suggested that Chl *b* antennae evolved more than once [42–44]. In light of all these data, we would propose that the term 'LHC', which has been used indiscriminately to denote a Chl *a/b* antenna, be reserved for antennae types seen in chloroplast systems only. To resolve beyond all doubt whether the Prochlorophyte antenna is evolutionarily distinct or divergent from the  $LHC_{II}$  antennae will require more detailed sequencing studies examining the primary structure of the *Prochloron*, *Prochlorothrix* and *Prochlorococcus* antenna apoproteins.

#### **Reaction centers**

$PS_{II}$  and  $PS_I$  particles have been prepared from *Prochloron* and *Prochlorothrix* which exhibit photochemical activity; immunological analysis of these particles and whole thylakoid membranes demonstrate the presence of the homologous reaction center polypeptides found also in cyanobacteria and chloroplasts. For example,  $PS_I$  particles from *Prochloron* and *Prochlorothrix* yield a polypeptide composition very similar to  $PS_I$  preparations from higher plants or cyanobacteria [67,81]. The composition of  $PS_{II}$  particles is somewhat less clear, but the major components of the  $PS_{II}$  complex have been identified. These include the Chl *a*-binding polypeptides CP47 and CP43 (47 and 43-kDa molecular mass chlorophyll protein, respectively) [46,67]; the reaction center proteins D1 and D2 ([45,73]; Bullerjahn and Krugh, unpublished results); the 10-kDa *psbH* protein [47]; and the 33-kDa *psbO* protein involved in stabilizing the donor (water-splitting) side of  $PS_{II}$  [82,83]. The *psbO* gene product or manganese stabilizing protein (MSP) of *Prochlorothrix* was found to be a hydrophobic protein as compared contrasting with the more hydrophilic MSP found in a green alga and a cyanobacterium [83]. A possible relation to photosynthetic functions is discussed below. As in cyanobacteria *Prochlorothrix* lacked the 23 and 17-kDa proteins of the oxygen evolving complex [83]. Homologs of the small, functionally enigmatic hydrophobic  $PS_{II}$



proteins have been found in *P. hollandica* (Bullerjahn and Krugh, unpublished results); this includes the so-called PsbJ and PsbK proteins whose presence in both cyanobacteria and chloroplasts has been well documented (see e.g. [84]).

#### *Electron carriers*

While no active preparations of the cytochrome  $b_6/f$  complex from Prochlorophytes have been reported, analysis of whole membranes by difference spectroscopy and tetramethylbenzidine staining have identified both cytochromes  $f$  and  $b_6$  in both *Prochloron* and *Prochlorothrix* (Bullerjahn and Sherman, unpublished results). Furthermore, the *petBD* genes encoding apocytochrome  $b_6$  and subunit 4 have been cloned and sequenced [47]. Lastly, examination of soluble fractions from *Prochlorothrix* has shown that the primary electron donor to  $PS_1$  is plastocyanin [36]; this is in contrast to an earlier paper which stated that a cytochrome  $c_{553}$  serves this function in *Prochlorothrix* [85]. In summary, virtually all of the components known to be associated with whole chain electron transport in oxygenic photosynthesis have been identified in either *Prochloron* or *Prochlorothrix*, thus it is reasonable to assume that the overall protein composition of such complexes is not substantially different than those reported for cyanobacteria and chloroplast systems.

#### *Modes of photosynthesis*

With the two photosystems and all electron carriers known from oxygenic photosynthesis in place, it is hardly surprising that photosynthetic oxygen evolution and carbon fixation do take place in the Prochlorophytes at rates which can support the carbon and energy demands for growth [9,17,18]. The firm positioning of Prochlorophytes within the cyanobacterial radiation has also prompted the search for anoxygenic photosynthesis as an alternative mode of photosynthetic energy conservation in *Prochlorothrix*. Anoxygenic photosynthesis is found among a number of, mainly filamentous, cyanobacteria and it involves a dual role for sulfide. Sulfide acts both as an inhibitor of oxygen evolution at the

donor side of  $PS_{II}$  [86] and as an electron donor to the plastoquinone pool mediated through an inducible sulfide-quinone oxidoreductase [87]. Green chloroplasts are in general very sensitive to sulfide inhibition and anoxygenic photosynthesis has not been found in these systems. *Prochlorothrix* was shown to have a constitutive but low capacity for anoxygenic photosynthesis at 1–5% of the light saturated oxygenic photosynthesis rates (Post and Arieli, unpublished results). Whereas such a low activity is not sufficient to support significant growth, it may still contribute to the survival of this organism during extended periods of anaerobiosis. This capacity for anoxygenic photosynthesis was accompanied by a continued oxygenic photosynthetic activity up to 5 mM sulfide, indicating a high resistance of the oxygen evolving complex of *Prochlorothrix* against sulfide stress (Post and Arieli, unpublished results). Interesting in this respect is the hydrophobic nature of the MSP in *Prochlorothrix* [82,83], which we suggest may secure the active site of the protein from sulfide intrusion. Whereas (partial) resistance of oxygenic photosynthesis has been observed in a number of species [89], it has never been related to biochemical properties of the MSP.

#### *Photosynthesis–light relationships*

The rate of photosynthetic oxygen evolution is a function of quantum flux impinging on the photosynthetic apparatus. Photosynthesis–light relationships have been frequently used to assess competitiveness of phytoplanktonic species under a given set of environmental conditions. The initial slope of the light saturation curve,  $\alpha$ , reflects the light utilization efficiency of photosynthesis and is directly related to the quantum efficiency of the photosynthetic process [90]. The maximal photosynthetic rate is a function of the average time needed to transfer electrons from  $H_2O$  to NADP through both photosystems [90]. The antenna function and the reaction center function are sometimes fit into photosynthetic units, a functional definition of the number of chlorophylls needed for the production of 1 molecule of  $O_2$  following a single turnover, saturating light

flash [90]. We have summarized the available data on photosynthetic activity of the Prochlorophyte species *Prochloron*, *Prochlorothrix* and *Prochlorococcus* in comparison to *Chlorella* [91–93] and *Oscillatoria* [94,95] as representatives of the green algae and the cyanobacteria respectively (Table 2). Although interpretation of photosynthetic data should be done with care because Chl partitioning among the major chlorophyll–protein complexes may be very different in the representatives of the various groups, we can still make some interesting observations. Firstly, the range in which  $\alpha$ , the light utilization efficiency of photosynthesis, of *Chlorella* varied was considerably lower than that for *Prochlorothrix*. Minimum quantum requirements in *Prochlorothrix* were found to be between 10 and 11 [61], comparable to both *Chlorella* [92] and marine phytoplankton species [90]. Hence, differences in  $\alpha$  may be explained from different light absorption efficiencies. The absorption cross-section of Chl was between 2 and 4 times smaller in *Chlorella* [92] than in *Prochlorothrix* [61]. This could be due to the absence in the latter of densely stacked grana, in which much of the Chl is shaded by neighbouring pigment molecules. *Prochlorococcus* maintained larger absorption cross-sections of Chl than common marine algae [96]. However, quantum requirements for photosynthetic C-fixation varied between 11–25 mol

quanta/mol C in three different strains of *Prochlorococcus* grown over a range of light intensities [96].  $P_{\max}$  in *Prochloron* is considerably higher than in any of the other species and it may be indicative of its symbiotic lifestyle, which forces it to optimally utilize high irradiances during daytime. It is further interesting to note that the large photosynthetic units of *Chlorella* (and other planktonic algae) are not matched by the Prochlorophytes. As effective PS<sub>II</sub> absorption cross-sections were found to be far smaller in *Prochlorothrix* (Post, unpublished results) than those reported for other species, this may be diagnostic for both smaller PS<sub>II</sub> antenna sizes and a different thylakoid organization in Prochlorophytes as suggested above. This is in agreement with the finding that photosynthesis in *Prochloron* [97] and *Prochlorothrix* [61] reaches saturation at light intensities that are high in comparison to those found for many green algae and cyanobacteria [91–95].

As is true for most if not all algae and cyanobacteria, the light intensity range which allows for maximal cell division rates of the Prochlorophytes species is much lower than that for maximal photosynthesis rates. *P. hollandica* reaches maximal growth rates at  $< 80 \mu\text{mol quanta m}^{-2} \text{ s}^{-1}$  [61]. Current unpublished work by Moore and Chisholm on *Prochlorococcus* has focused on the growth characteristics of the dif-

Table 2

Photosynthetic characteristics of Prochlorophytes

|                             | $\alpha^a$ | $P_{\max}^b$ | $I_s^c$ | PSU <sub>O<sub>2</sub></sub> <sup>d</sup> | $\tau^e$ |
|-----------------------------|------------|--------------|---------|-------------------------------------------|----------|
| <i>Chlorella</i> [91–93]    | 1.5–2.3    | 110– 425     | > 150   | 1360–5460                                 | 5.5–14.2 |
| <i>Oscillatoria</i> [94,54] | 2.4–5.8    | 313– 680     | 60–240  | 920–1660                                  | –        |
| <i>Prochloron</i> [97]      | 1.9–3.9    | 815–1062     | 175–575 | 1200–3000 <sup>f</sup>                    | –        |
| <i>Prochlorothrix</i> [61]  | 2.0–3.5    | 252– 552     | > 250   | 1512–3672                                 | 4.2– 4.4 |
| <i>Prochlorococcus</i> [96] | 2.6–8.8    | 91– 416      | 40–340  | –                                         | –        |

Photosynthetic characteristics of Prochlorophyte species *Prochloron*, *Prochlorococcus* and *Prochlorothrix* as compared to the common green alga *Chlorella* sp. and the common cyanobacterium *Oscillatoria* sp.

<sup>a</sup> Light utilization efficiency  $\alpha$ ,  $\mu\text{mol O}_2 \mu\text{mol Chl a}^{-1} \text{ h}^{-1} \mu\text{mol}^{-1} \text{ quanta m}^{-2} \text{ s}^{-1}$ .

<sup>b</sup> Light saturated rate of photosynthesis  $P_{\max}$ ,  $\mu\text{mol O}_2 \mu\text{mol Chl a}^{-1} \text{ h}^{-1}$ .

<sup>c</sup> Saturating light intensity  $I_s$ ,  $\mu\text{mol quanta m}^{-2} \text{ s}^{-1}$ .

<sup>d</sup> Photosynthetic unit size PSU<sub>O<sub>2</sub></sub>, mol Chl a per mol O<sub>2</sub> produced.

<sup>e</sup> Minimal turnover time  $\tau$ , ms.

<sup>f</sup> Calculated using the a Chl/P<sub>700</sub> unit size of 240 [55] and assuming a PSI/PSII ratio of 1.2–2.5 as observed in *Prochlorothrix* [61].

ferent marine isolates. Sargasso Sea strain SS120 yields a maximal growth rate of 0.55 divisions day<sup>-1</sup>. Its photosynthesis rate becomes light saturated at 40  $\mu\text{mol quanta m}^{-2} \text{s}^{-1}$ . While this strain is well adapted for growth in very low light (3  $\mu\text{mol quanta m}^{-2} \text{s}^{-1}$ ), it seems to be sensitive to photoinhibitory damage to PS<sub>II</sub> at light intensities as low as 70  $\mu\text{mol quanta m}^{-2} \text{s}^{-1}$ . By comparison, the Mediterranean strain MED4 is clearly better adapted to higher light environments; photosynthesis saturates at 60  $\mu\text{mol quanta m}^{-2} \text{s}^{-1}$ , while the minimum light intensity supporting growth is approximately 16  $\mu\text{mol quanta m}^{-2} \text{s}^{-1}$ . MED4 is also comparatively resistant to photoinhibition (Moore and Chisholm, unpublished results). Future work aimed at understanding antenna structure and function in *Prochlorococcus* should identify the physiological bases for the adaptation to surface vs. deep water light environments.

The Prochlorophytes *Prochloron* and *Prochlorothrix* both showed plasticity in their photosynthetic characteristics as a result of light-shade adaptation [61,97]. Light-shade adaptation was apparent as changes in photosystem ratio [61] and changes in antenna contribution to the pigment bed as observed from changes in Chl *a/b* ratio of cells [56,58,61,97]. Field data based on single cell fluorescence detection and HPLC pigment analysis suggest that light-shade adaptation may further occur in the marine Prochlorophyte *Prochlorococcus* [98,99]. These observations were confirmed by culture studies of three strains of *Prochlorococcus* grown at different light intensities [96].

The apparent sensitivity to high light intensities in *Prochlorococcus* is compounded by the observation that *Prochlorothrix* is much more sensitive to photoinhibition than green algae grown under identical conditions [100]. The site of photoinhibition was found to be located on the D1 protein of the PS<sub>II</sub> reaction center and irreversible damage to this protein was followed by far slower repair than found in green algae [100]. An additional response seen in *Prochlorothrix* during long-term adaptation to supersaturating light is the accumulation of zeaxanthin pigments at the cell surface [26]. This results in the selec-

tive screening of wavelengths in the blue region of the spectrum. The zeaxanthin is bound to a protein complex which appears to coat the cell surface, thus this complex has been proposed to represent an S (surface)-layer which assembles under light stress. Cultures shifted to high light exhibit a 2.3-fold increase in the level of this protein within 24 h [26], and Northern blots showed that the mRNA levels for this complex is under transcriptional control by light (Engle and Bullerjahn, unpublished results). Overall, the accumulation of this carotenoid-protein layer may account for much of the 40% decrease in the quantum efficiency for O<sub>2</sub> evolution in high-light adapted cells [61].

#### *Regulation of excitation energy distribution*

Light-shade adaptation is responsible for long term regulation of the light harvesting capacity, tuning in to the average photon flux impinging on photosynthetic cells. However, short term changes in light intensity and spectral quality may cause to imbalances in excitation energy supply to PS<sub>II</sub> and PS<sub>I</sub> and hence in their respective activities. In both chloroplast and cyanobacterial systems, mechanisms operate to regulate energy imbalances between PS<sub>II</sub> and PS<sub>I</sub>. This phenomenon, often termed the state 1 > 2 transition, acts to maximize linear electron transport should the wavelength of the ambient light favor absorption by one photosystem over the other. In a general sense this is achieved by changes in antenna orientation such that it transfers excitation energy preferentially towards the photosystem with the smallest effective absorption cross-section. For example, in far-red light preferentially absorbed by PS<sub>I</sub>, the light harvesting antenna is oriented such that the energy harvested by it is trapped in PS<sub>II</sub> (state 1). In a state 2 situation, in light preferentially absorbed by PS<sub>II</sub>, energy is redistributed to PSI. Such transitions are visualized from changes in PS<sub>II</sub> fluorescence yield; state 1 is the high fluorescence condition, while adaptation to state 2 results in a marked decrease in PS<sub>II</sub> fluorescence. In green chloroplasts, the major antenna LHC<sub>II</sub> complex is reversibly phosphorylated in a light-dependent fashion by a thylakoid kinase which is activated by sensing the

redox state of electron carriers between PS<sub>II</sub> and PS<sub>I</sub> (for reviews see [101,102]). Upon overexcitation of PS<sub>II</sub> relative to PS<sub>I</sub>, the kinase becomes activated, and it phosphorylates the LHC<sub>II</sub> apoproteins. A phosphorylated subset of the antenna then decouples from PS<sub>II</sub> and so restores the balance in energy flows towards PS<sub>I</sub> and PS<sub>II</sub>. Accompanying these events is the destacking of the thylakoid granal membranes as a consequence of the movement of phosphorylated LHC<sub>II</sub> away from PS<sub>II</sub> centers. In the phycobilisome-containing organisms (cyanobacteria and red algae), state transitions do not occur by this mechanism: instead, reorganization of the photosynthetic apparatus occurs such that energy redistribution is enabled by modulating spillover from the PS<sub>II</sub> Chl *a/b* core to PS<sub>I</sub> [103,104].

An early study on *Prochloron* reported that state 1 > 2 transitions may not occur in this species, based on the presence of a continuously active thylakoid protein kinase [65]. A similar situation was encountered in *Prochlorothrix*, where redox control of a thylakoid protein kinase could be enforced by the addition of strong reducing or oxidizing agents only [76]. Initially, redox controlled kinase activity was related to state 1 > 2 transitions [105], but this suggestion was discounted in a later publication [76]. Recent observations on *Prochlorothrix* show that the opposite may be true, and the same findings suggest that a similar mechanism may operate in *Prochloron* [61,68,73]. State 1 > 2 transitions could be clearly shown in the latter species from *in vivo* measurements of modulated fluorescence [61] and fluorescence induction [72] after red/far red light treatment of the cells. Additional work showed that the 35-kDa Chl *a/b* antenna protein forms the major target for the kinase activity located in the thylakoid membrane [69,70]. Under the proper experimental conditions the 35-kDa antenna apoprotein undergoes reversible phosphorylation in a light and/or redox dependent manner both *in vivo* and *in vitro* [68]. Since it was shown that the Chl *a/b* antenna of *Prochlorothrix* and *Prochloron* are immunologically related [53], it was subsequently suggested that a similar situation may be found in the latter species [68]. White light at moderate to saturating intensity, and PS<sub>II</sub>

light (650 nm) yielded enhanced phosphorylation at the same timescale (approx. 30 min) as the state 1 > 2 transition [72,73]. Another indication that antenna phosphorylation is related to state 1 > 2 transitions comes from the finding that phosphatase inhibition yielded a highly phosphorylated antenna, and that cells treated with inhibitor were locked in state 2 *in vivo* [68]. There is some evidence suggesting that state 1 > 2 transitions do not just modulate PS<sub>II</sub> absorption cross-sections, but that in state 2 the Chl *a/b* antenna becomes a more efficient PS<sub>I</sub> antenna. Monitoring PS<sub>I</sub> function *in vivo* by measuring non-photochemical fluorescence quenching (indicative of a PS<sub>I</sub>-driven transmembrane pH gradient), shows that the fluorescence loss following a transition to state 2 is accompanied by an increased diversion of excitation energy towards PS<sub>I</sub> [73]. All these data suggest an involvement of protein phosphorylation in regulating energy distribution between the photosystems, analogous to what has been observed in chloroplast systems [101,102]. However, so far it is unclear whether protein phosphorylation forms the molecular mechanism of state 1 > 2 transitions or that it is simply an accompanying process, which in itself has no bearing on the regulation of excitation energy distribution. If the former proves to be true than this would provide strong evidence that kinase activity played a role in regulating photosynthetic activities long before the chloroplast LHC<sub>II</sub> evolved.

Since state transitions have not been reported for *Prochlorococcus* and *Prochloron*, it remains to be shown that such dynamic short-term responses occur in other Prochlorophytes. However, as described previously, there is a phosphorylation mechanism acting on the *Prochloron* antenna [65] and thus it is possible that state transitions play a role in antenna orientation *in hospite*. On the basis of the information gathered on *Prochlorothrix*, one can now design the experimental conditions for the study of state transitions in *Prochloron* and *Prochlorococcus*.

#### *Thylakoid organization in Prochlorophytes*

Studies in recent years have established that the organization of the photosynthetic membrane

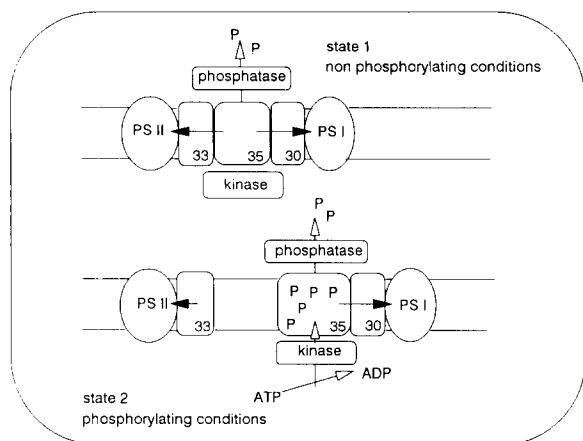

Fig. 1. Model for the molecular mechanism of state 1 > 2 transitions in photosynthetic prokaryotes carrying chlorophyll *a/b* antennae. The chlorophyll *a/b* antenna consists of a bulk antenna which is located on 30 and 35-kDa apoproteins and associates preferably with PS I. A minor chlorophyll *a/b* antenna is carried by a 33-kDa apoprotein and is found to co-purify with PS II. The 35-kDa antenna protein forms the major target protein of light/redox controlled kinase activity. Upon phosphorylation, the bulk antenna excludes PS II centers and enters a more tight association with PS I. Under such conditions, the energy transfer to PS I is enhanced. This process reverses to a state of balanced energy transfer by the bulk antenna following dephosphorylation of the antenna in either darkness or far red illumination.

in both *Prochloron* and *Prochlorothrix* is somewhat different than in cyanobacterial and chloroplast systems. As mentioned briefly above, evidence has accumulated indicating that a large part of the antenna is energy coupled to PS<sub>I</sub> at all times. This differs considerably from the situation in green chloroplasts and cyanobacteria, where the bulk antennae were identified as light harvesting antennae of PS<sub>II</sub>. Many aspects of the *Prochlorophyte* photosynthetic machinery, particularly with respect to the structure and composition of PS<sub>I</sub> and PS<sub>II</sub> centers, and the reversible phosphorylation of the antenna, are structurally or functionally analogous to other photosynthetic systems. Other observations, mainly that of a Chl *a/b* antenna associated with PS<sub>I</sub>, have prompted us to construct the model for thylakoid organization in *Prochlorothrix* [73] as presented in Fig. 1. The model predicts that a minor Chl *a/b* an-

tenna bound to a 33-kDa protein serves a light harvesting antenna to PS<sub>II</sub>. However, the bulk of the Chl *a/b* antenna is bound to proteins 30 and 35 kDa molecular mass and it is this antenna which is associated with PS<sub>I</sub>. Under non-phosphorylating conditions (state 1), both PS<sub>I</sub> and PS<sub>II</sub> share a common light-harvesting antenna composed largely of the 30/35-kDa Chl *a/b* antenna in its dephosphorylated state. This condition exists both in the dark and upon treatment with far-red (PS<sub>I</sub>) light. Transfer of cells to either high light and red light provokes the phosphorylation of the 35-kDa protein and the decoupling of the bulk antenna from PS<sub>II</sub> (state 2). This results in the exclusion of PS<sub>II</sub> centers from the major light-harvesting apparatus in the cell. It is this situation which we argue results in the lateral heterogeneity seen in freeze-etch electron micrographs. As mentioned previously, the EF<sub>s</sub> particles seen following freeze-etch are smaller than those in chloroplasts, consistent with our model stating that the PS<sub>II</sub> centers should lack a large antenna complex. However, the fact that thylakoid membrane stacking occurs in both *Prochloron* and *Prochlorothrix* deserves our future attention. From the limited data available, we would propose that the degree of stacking and lateral heterogeneity in *Prochloron* and *Prochlorothrix* arises from interactions among the PS<sub>II</sub> centers excluded from the bulk antenna/PS<sub>I</sub> complexes, thus resulting in increased stacking in a state 2 situation. Overall, the lower degree of stacking in *Prochlorophytes* can be attributed both to the lack of an LHC<sub>II</sub> complex to stabilize membrane appression, and a high PS<sub>I</sub>/PS<sub>II</sub> ratio in comparison to chloroplasts [61]. Of course, this model is speculative, but it is testable and will help addressing directly the structural and mechanistic requirements necessary to drive thylakoid stacking. E.g. our model predicts that Emerson enhancement does not occur in *Prochlorothrix*, on the basis that action spectra for PS<sub>I</sub> and PS<sub>II</sub> activity are expected to show a strong resemblance. Early photoacoustic measurements on *Prochlorothrix* indeed revealed that far red illumination did not enhance photosynthetic activity and that chemical energy storage was considerable (Post and Canaani, unpublished results).

Although the above model is based on information obtained on *Prochlorothrix*, we propose that it be used as working model for the two marine Prochlorophytes *Prochlorococcus* and *Prochloron*. Properties in the latter two species, like the immunological relationship between the *Prochlorothrix* and *Prochloron* antenna [53] and the dim fluorescence of *Prochlorococcus* [98], suggest that they too have a different thylakoid organization than is found in the green chloroplast. It is therefore of utmost importance to establish whether there is a unifying concept for thylakoid organization in Prochlorophytes, which distinguishes them from other photosynthetic systems. In addition, it should be studied if such a difference bears consequences on the success of Prochlorophytes in occupying their ecological niche(s). The next section addresses the natural habitats of Prochlorophytes and describes properties that may relate to their existence, proliferation and survival strategies.

**Intermezzo: Why having a light harvesting antenna be energy coupled to PS<sub>I</sub>?**

The presence of the Prochlorophytes within the cyanobacterial lineage also suggests that both the *Prochlorothrix* / *Prochloron* antennae and phycobilisomes are antenna types which could have arisen from a common ancestral phototroph. Such an ancestor would have both a Chl *a/b* PS<sub>I</sub> antenna and biliprotein PS<sub>II</sub> antenna. While no such organism has been described so far, it is consistent with the observation that both these antennae have ancient origins within a prokaryotic lineage. Organisms having only either phycobilisomes or Chl *a/b* antennae arose by losing one of the two antenna types. With a mechanism for excitation energy distribution in place, one can easily understand that a PS<sub>I</sub> antenna becomes disposable. However, it is difficult to imagine what selective pressures could result in the loss of the phycobilisome.

The most unusual feature of *Prochloron*, *Prochlorothrix*, and possibly *Prochlorococcus*, is the degree of energy coupling between antenna and PS<sub>I</sub>. All other cyanobacteria and chloroplast systems are arranged such that the major antenna complex is tightly coupled to PS<sub>II</sub>. This arrange-

ment evidently results from a strong dependence on linear electron transport to contribute both to a proton-motive force and an accumulation of reducing equivalents. The antenna organization of *Prochloron* and *Prochlorothrix* appears to yield a situation in which energy transfer to PS<sub>I</sub> is optimized. In order for this to make good biological sense, the demands for reducing equivalents must be met by other means. We suggest that *Prochlorothrix* and other Prochlorophytes may have evolved from a bacterium thriving in one of the following environments:

- (i) In environment with sources of reduced carbon. Oxidation of reduced substrates is coupled to NAD(P)H accumulation. Consequently, ATP demands could be met by PS<sub>I</sub> activity, and pools of reducing power could be maintained by both PS<sub>II</sub> and oxidative pathways. Another possibility is that reduced carbon is capable of serving as an alternative electron donor. Studying the interactions of *Prochlorothrix* with reduced substrates should be an important priority.
- (ii) Considering that *Prochlorothrix* can exhibit low rates of anoxygenic photosynthesis, it may maintain itself in the presence of sulfide. Moreover, the resistance of PS<sub>II</sub> to sulfide is an indication of the importance of anoxic environments in the evolution of this species.
- (iii) *Prochlorothrix* may have evolved in environments with steep gradients in ambient oxygen concentrations. Such environments would enable it to combine properties like photoheterotrophy or anoxygenic photosynthesis with photosynthetic activity involving both photosystems.
- (iv) Lastly, the sensitivity to photoinhibition as apparent in *Prochlorococcus* ([96]; Moore and Chisholm, unpublished results) and as has been established for *Prochlorothrix* [100], may have added selective pressure towards the development of an antenna with efficient energy transfer to PS<sub>I</sub>. This is further supported by the finding that following a short period of strong PSII activity, the antenna reorganizes itself such that PS<sub>II</sub> centers are largely excluded from excitation energy supply. No rigorous experiments have been undertaken on any of the Prochlorophytes to test the above hypotheses.

### *Prochlorophytes in their natural habitat*

It is self evident that the photosynthetic apparatus should operate to support cell integrity and growth of the Prochlorophytes in their natural environment. Hence, a closer look at the distribution in nature may give us additional information on the ecological niche of Prochlorophytes and the possible contributions of the photosynthetic apparatus. Ironically, most is known of the ecology of the marine planktonic Prochlorophytes that until recently were not cooperative in laboratory studies.

*Prochloron* is found as an obligate endosymbiont of marine tunicates, mainly from shallow (< 5 m), warm (20–26°C), (sub)tropical marine waters [19,52,58–60], although it reportedly thrives in deeper waters (> 20 m) as well [60,65, 81,106]. *Prochloron* from deeper waters adapts to the lower light flux by increasing its light harvesting capacity with a concomitant loss of maximal photosynthetic activity [97]. An early study suggested that *Prochloron* does not function well at osmolarities met in seawater and that it may depend on fast diffusing factors from the animal host into its photosynthetic cell [106]. Doubt was cast on the former observation, when cells were shown to maintain high photosynthesis rates in buffered seawater [97]. Until now, no successful attempts have been made to characterize the nature of the symbiotic relationship or to assess the factors limiting the growth of *Prochloron* populations *in hospite*. A carbon budget of photosynthetically fixed carbon showed that 15–20% of the carbon fixed per day by high light adapted *Prochloron* is translocated to the tunicate host [97]. It is not known whether the symbiosis under low light conditions involves carbon translocation to the host.

*Prochlorothrix* is found in a number of rather eutrophic, shallow lakes in the center part of the Netherlands. These wind mixed lakes are characterized by a high turbidity, a relatively high background extinction due to water colour and hence light does not penetrate beyond depths of 20–30 cm [107]. Moreover, their water contains considerable amounts of dissolved organic matter [107]. Due to the steep light gradient and possibly activ-

ity of heterotrophic bacteria, one finds anoxic conditions at the water-sediment interphase, conditions that may extend into the water column when mixing is interrupted. Anoxic conditions are normally accompanied by the appearance of sulfide in the water phase [108] and hence the observed resistance of PS<sub>II</sub> to sulfide and the potential for (low) anoxygenic photosynthetic activity [88] may have ecological significance. *Prochlorothrix* populations build up during the summer months when water temperatures reach 15–18°C. [109]. In this respect the population dynamics of *Prochlorothrix* show similarity to those of cyanobacteria for which (late) summer blooms have been ascribed to their favorable light harvesting capability [110,111], photosynthesis/respiration ratio [112,113] and maintenance energy requirements [114] as compared to eukaryotic algae.

*Prochlorococcus* seems to be ubiquitous and has been reported from temperate and (sub) tropical climate zones, namely the Sargasso Sea, North Atlantic [98,99,115,116] and tropical Atlantic [14,15], the Mediterranean [117], the Red Sea [118] and the Gulf of Aqaba (Post and Lindell, unpublished results), Pacific [119–121] and the Southern California Bight [16] and finally the Banda Sea, Indonesia [122]. On a north-south transect in the eastern North-Atlantic no Prochlorophytes could be found at latitudes above 42°N [123]. Whereas the free-living marine Prochlorophytes are found throughout the photic zone [98,99,116,117], they seem to dominate the deep chlorophyll maximum at densities of 10<sup>4</sup>–10<sup>5</sup> cells ml<sup>-1</sup> [99,116]. The marine Prochlorophytes seem to position themselves under the *Synechococcus* population according to some authors [95,112,113]. This is in itself a surprising observation since part of the *Synechococcus* population possesses phycoerythrin enriched phycoerythrin [124], which is optimally suited for light harvesting of those wavelengths that penetrate deepest [125], i.e. to those depths where the Prochlorophytes are found. However, it could well be that the presence of divinyl Chl *b*, with an absorption maximum red shifted in the Soret band by some 8 nm [56], contributes significantly to the light harvesting capacity of Prochlorophytes at

great depth. Interesting in this respect are the low Chl *a/b* ratios reported for marine free living Prochlorophytes [16,99], which underscribes a strategy of aiming at optimal light harvesting by these organisms. Culture study showed that marine Prochlorophytes are better absorbers than scatterers in the blue part of the spectrum [126]. This is the only example among phytoplanktonic species so far. There are also indications that their positioning in the water column is related to the depth of the nitracline [98], suggesting that the nitrogen status of the cells is related to their vertical distribution. Differences in cellular pigment contents of the Prochlorophytes were reported to result from different light history [99]. Since Chl contents are known to react strongly to the nutrient status of the cell, the observed lower Chl contents of Prochlorophyte cells from shallow layers may be explained as well from the different nitrogen status of these cells as compared to those thriving in the vicinity of a higher inorganic nitrogen supply. Nitrogen and light were found to be the key environmental factors controlling cell cycling of Prochlorophytes in the western Mediterranean [127]. Prochlorophyte numbers dominate the phytoplankton groups [98,115,116] and they may account for up to 60% of primary productivity in the deepest layers of the marine photic zone [16]. Marine free-living Prochlorophytes form about 40% of the phytoplankton carbon biomass in the Sargasso Sea [115] with an unknown contribution to the bacterial biomass.

### Concluding remarks

Taxonomic studies tell us that the Prochlorophytes are cyanobacteria, although the evolutionary origin(s) of the Prochlorophyte light harvesting antenna(e) – the property most distinguishing Prochlorophytes from cyanobacteria – is still unknown. Biochemical/physiological studies indicate that their photosynthetic apparatus is organized in a unique way. The special features of prokaryotic chlorophyll *a/b* antenna in *Prochloron* and *Prochlorothrix* may prove useful in

understanding general rules for how antenna systems in photosynthetic organisms function and respond to changes in ambient light and nutrient conditions. An in depth study of the photosynthetic features of these prokaryotes is necessary to understand fully both the selective advantage of a chlorophyll *a/b* antenna in Prochlorophyte evolution and the ability of Prochlorophytes to colonize very specific niches in marine and fresh water environments.

Much work remains to be done regarding the Prochlorophytes. Our major interest has been to examine the structure-function relationships in the photosynthetic apparatus in an effort to understand how their different antenna systems function, and thus how it contributes to the growth and metabolism of the cell. Two areas need to be addressed in the near future. Firstly, the complete sequence of the *Prochlorothrix* Chl *a/b* binding antenna apoproteins should be obtained and analyzed for any domains which might cooperate in Chl binding. This study is essential in establishing the degree of divergence from the antenna apoproteins of green chloroplasts. Secondly, a detailed study on the structure and function of the *Prochlorococcus* antenna is necessary to assess its degree of homology to the *Prochloron* and *Prochlorothrix* antennae. Additional important studies include examining the molecular basis for the anoxygenic, sulfide resistant photosynthesis; perhaps such work can give clues towards understanding the functional significance of a PS<sub>I</sub>/antenna complex and the contribution of alternative/additional electron donors in photosynthetic electron transport.

### Acknowledgements

Dr. Sallie Chisholm and Lisa Moore provided work prior to publication and helpful discussions. The work compiled from the authors' laboratories was supported by Grants DCB-8903060 and MCB-9204672 from the National Science Foundation (to G.S.B.) and award 88-00341 from the US/Israel Binational Science Foundation (to A.F.P.).



## References

- 1 Green, B.R., Pichersky, E. and Klopstech, K. (1991) Chlorophyll a/b binding proteins: an extended family. *TIBS* 16, 181–186.
- 2 Wilhelm, C. (1990) The biochemistry and physiology of light-harvesting processes in chlorophylls *b*- and *c*-containing algae. *Plant Physiol. Biochem.* 28, 293–306.
- 3 Livne, A., Nelson, E.Y. and Sukenik, A. (1992) Immunological cross-reactivity among photosynthetic proteins from various marine unicellular algal species. *Bot. Mar.* 35, 181–187.
- 4 Barber, J. (1986) New organisms for elucidating the origin of higher plant chloroplasts. *TIBS* 11, 234.
- 5 Walsby, A.E. (1986) *Prochlorophytes*. Origins of chloroplasts. *Nature* 320, 212.
- 6 Penny, D. (1989) What, if anything is *Prochloron*? *Nature* 337, 304–305.
- 7 Turner, S. (1992) Perspective: the phylogenetic relationship between Prochlorophytes and chloroplasts. *Cyanobioscience* 8, 5–6.
- 8 Lewin, R.A. (1976) Prochlorophyta as a proposed new division of algae. *Nature* 261, 697–698.
- 9 Burger-Wiersma, T., Stal, L.J. and Mur, L.R. (1989) *Prochlorothrix hollandica* gen. nov., sp. nov., a filamentous oxygenic photoautotrophic prokaryote containing chlorophylls *a* and *b*: assignment to *Prochlorothricaceae* fam. nov. and order *Prochlorales* Florenzano, Balloni and Materassi 1986, with emendation of the ordinal description. *Int. J. Syst. Bact.* 39, 250–257.
- 10 Lewin, R.A. (1975) A marine *Synechocystis* (Cyanophyta, Chroococcales) epizoid on ascidians. *Phycologia* 14, 153–160.
- 11 Lewin, R.A. and Whithers, N.W. (1975) Extraordinary pigment composition of a prokaryotic alga. *Nature* 256, 735–737.
- 12 Thorne, S.W., Newcomb, E.H. and Osmond, C.B. (1977) Identification of chlorophyll *b* in extracts of prokaryotic algae by fluorescence spectroscopy. *Proc. Natl. Acad. Sci. USA* 74, 575–578.
- 13 Burger-Wiersma, T., Veenhuis, M., Korthals, H.J., Van Der Wiel, C.C.M. and Mur, L.R. (1986) A new prokaryote containing chlorophylls *a* and *b*. *Nature* 320, 262–264.
- 14 Gieskes, W.W.C. and Kraay, G.W. (1983) Unknown chlorophyll *a* derivatives in the North Sea and the tropical Atlantic Ocean revealed by HPLC analysis. *Limnol. Oceanogr.* 28, 757–765.
- 15 Gieskes, W.W.C. and Kraay, G.W. (1986) Floristic and physiological differences between the shallow and the deep nanoplankton community in the euphotic zone of the open tropical Atlantic revealed by HPLC analysis of pigments. *Mar. Biol.* 91, 567–576.
- 16 Chisholm, S.W., Olson, R.J., Zettler, E.R., Goericke, R., Waterbury, J.B. and Welschmeyer, N.A. (1988) A novel free-living Prochlorophyte abundant in the oceanic euphotic zone. *Nature* 334, 340–343.
- 17 Chisholm, S.W., Frankel, S.L., Goericke, R., Olson, R.J., Palenik, B., Waterbury, J.B., West-Johnsrud, L., Zettler, E.R. (1992) *Prochlorococcus marinus* nov. gen. nov. sp.: an oxyphototrophic marine prokaryote containing divinyl chlorophyll *a* and *b*. *Arch. Microbiol.* 157, 297–300.
- 18 Lewin, R.A. and Cheng, L. (1989) Collection and handling of *Prochloron* and its ascidian hosts. In: *Prochloron*, a Microbial Enigma (Lewin, R.A. and Cheng, L., Eds.), pp. 9–21. Chapman and Hall, New York, NY.
- 19 Giddings, T.H., Whithers, N.W. and Staehelin, L.A. (1980) Supramolecular structure of stacked and unstacked regions of the photosynthetic membranes of *Prochloron* sp., a prokaryote. *Proc. Natl. Acad. Sci. USA* 77, 352–356.
- 20 Miller, K.R., Jacob, J.S., Burger-Wiersma, T. and Matthijs, H.C.P. (1988) Supramolecular structure of the thylakoid membrane of *Prochlorothrix hollandica*: a chlorophyll *b*-containing prokaryote. *J. Cell Sci.* 91, 577–586.
- 21 Schulz-Baldes, M. and Lewin, R.A. (1976) Fine structure of *Synechocystis didemni* (Cyanophyta: Chroococcales). *Phycologia* 15, 1–6.
- 22 Berhow, M.A. and McFadden, B.A. (1983) Ribulose 1,5-biphosphate carboxylase and phosphoribulokinase in *Prochloron*. *Planta* 158, 281–287.
- 23 Swift, H. and Leser, G. (1989) Cytochemical studies on Prochlorophytes: localization of DNA and ribulose 1,5 biphosphate carboxylase/oxygenase. *J. Phycol.* 25, 751–758.
- 24 Hawthornthwaite, A.M. and Codd, G.A. (1988) RuBisCo and the carboxysomes of *Prochlorothrix hollandica*. In: *Proceedings of the VI International Symposium on Photosynthetic Prokaryotes*, p. 110.
- 25 Golecki, J.R. and Juergens, U.J. (1989) Ultrastructural studies on the membrane systems and cell inclusions of the filamentous Prochlorophyte *Prochlorothrix hollandica*. *Arch. Microbiol.* 152, 77–82.
- 26 Engle, J.M., Burkhart, W., Sherman, D.M. and Bullerjahn, G.S. (1991) Purification and characterization of a surface-associated carotenoid-binding complex from the photosynthetic prokaryote *Prochlorothrix hollandica*. *Arch. Microbiol.* 155, 453–458.
- 27 Omata, T., Okada, M. and Murata, N. (1985) Separation and partial characterization of membranes from *Prochloron* sp. *Plant Cell Physiol.* 26, 579–584.
- 28 Moriarty, D.J.W. (1979) Muramic acid in the cell walls of *Prochloron*. *Arch. Microbiol.* 120, 191–193.
- 29 Stackebrandt, E. and Kandler, O. (1982) The murein type of *Prochloron*. *Zentralbl. Bakteriell. Hyg., I. Abt. Orig. C* 3, 354–357.
- 30 Juergens, U.J. and Burger-Wiersma, T. (1989) Peptidoglycan-polysaccharide complex in the cell wall of the filamentous Prochlorophyte *Prochlorothrix hollandica*. *J. Bacteriol.* 171, 498–502.
- 31 Perry, G.J., Gillan, F.T. and Johns, R.B. (1978) Lipid composition of a Prochlorophyte. *J. Phycol.* 14, 369–371.
- 32 Murata, N. and Sato, N. (1983) Analysis of lipids in *Prochloron* sp.: occurrence of monoglucosyl diacylglycerol. *Plant Cell Physiol.* 24, 133–138.

- 33 Volkman, J.K., Burger-Wiersma, T., Nichols, P.D. and Summons, R.E. (1988) Lipids and chemotaxonomy of *Prochlorothrix hollandica*, a planktonic prokaryote containing chlorophylls *a* and *b*. *J. Phycol.* 24, 554–559.
- 34 Gombos, Z. and Murata, N. (1991) Lipids and fatty acids of *Prochlorothrix hollandica*. *Plant Cell Physiol.* 32, 73–77.
- 35 Herdman, M. (1981) Deoxyribonucleic acid base composition and genome size of *Prochloron*. *Arch. Microbiol.* 129, 314–316.
- 36 Bullerjahn, G.S. and Post, A.F. (1993) Prochlorophytes, are they more than chlorophyll *a/b* containing cyanobacteria? *CRC Crit. Rev. Microbiol.* 19, 43–59.
- 37 Dionisio-Sese, M.L., Shimada, A., Maruyama, T. and Miyachi, S. (1993) Carbonic anhydrase activity of *Prochloron* sp. isolated from an ascidian host. *Arch. Microbiol.* 159, 1–5.
- 38 Kaplan, A., Schwarz, R., Lieman-Hurwitz, J. and Reinhold, L. (1991) Physiological and molecular properties of the inorganic carbon-concentrating mechanism in cyanobacteria. *Plant Physiol.* 97, 851–855.
- 39 McKay, R.M., Salgado, D., Bonen, I., Stackebrandt, E. and Doolittle, W.F. (1982) The 5S ribosomal RNAs of *Paracoccus denitrificans* and *Prochloron*. *Nucleic Acids Res.* 10, 2963–2970.
- 40 Seewaldt, E. and Stackebrandt, E. (1982) Partial sequence of 16S ribosomal RNA and the phylogeny of *Prochloron*. *Nature* 295, 618–620.
- 41 Van Valen, L.M. (1982) Phylogenies in molecular evolution: *Prochloron*. *Nature* 298, 493–494.
- 42 Turner, S., Burger-Wiersma, T., Giovannoni, S.J., Mur, L.R. and Pace, N.R. (1988) The relationship of a Prochlorophyte *Prochlorothrix hollandica* to green chloroplasts. *Nature* 337, 380–385.
- 43 Palenik, B. and Haselkorn, R. (1992) Multiple evolutionary origins of Prochlorophytes, the chlorophyll *b*-containing prokaryotes. *Nature* 355, 265–267.
- 44 Urbach, E., Robertson, D.L. and Chisholm, S.W. (1992) Multiple evolutionary origins of Prochlorophytes within the cyanobacterial radiation. *Nature* 355, 267–270.
- 45 Morden, C.W. and Golden, S.S. (1989) *psbA* genes indicate common ancestry of Prochlorophytes and chloroplasts. *Nature* 337, 382–385.
- 46 Greer, K.L. and Golden, S.S. (1991) Nucleotide sequence of *psbB* from *Prochlorothrix hollandica*. *Plant Mol. Biol.* 17, 915–917.
- 47 Greer, K.L. and Golden, S.S. (1992) Conserved relationship between *psbH* and *petBD* genes: presence of a shared upstream element in *Prochlorothrix hollandica*. *Plant Mol. Biol.* 19, 355–365.
- 48 Morden, C.W. and Golden, S.S. (1991) Sequence analysis and phylogenetic reconstruction of the genes encoding the large and small subunits of ribulose-1,5-bisphosphate carboxylase/oxygenase from the chlorophyll *b*-containing prokaryote *Prochlorothrix hollandica*. *J. Mol. Evol.* 32, 379–395.
- 49 Golden, S.S., Morden, C.W. and Greer, K.L. (1993) Comparison of sequences and organization of photosynthesis genes among the Prochlorophyte *Prochlorothrix hollandica*, cyanobacteria and chloroplasts. In: *Symbiogenesis, Prochlorophytes and the Origins of Plastids* (Lewin, R.A., Ed.), Chapman and Hall, New York, in press.
- 50 Lockhart, P.J., Penny, D., Hendy, M.D. and Larkum, A.W.D. (1993) Is *Prochlorothrix hollandica* the best choice as a prokaryotic model for higher plant Chl *a/b* photosynthesis? *Photosynthesis Res.* 37, 61–68.
- 51 Morden, C.W. and Golden, S.S. (1989) Corrigendum: *psbA* genes indicate common ancestry of Prochlorophytes and chloroplasts. *Nature* 339, 400.
- 52 Lockhart, P.J., Beanland, T.J., Howe, C.J. and Larkum, A.W.D. (1992) Sequence of *Prochloron didemni* *atpBE* and the inference of chloroplast origins. *Proc. Natl. Acad. Sci. USA* 89, 2742–2746.
- 53 Bullerjahn, G.S., Jensen, T.C., Sherman, D.M. and Sherman, L.A. (1990) Immunological characterization of the *Prochlorothrix hollandica* and *Prochloron* sp. chlorophyll *a/b* antenna proteins. *FEMS Microbiol. Lett.* 67, 99–106.
- 54 Howe, C.J., Beanland, T.J., Larkum, A.W.D. and Lockhart, P.J. (1992) Plastid origins. *TREE* 7, 378–383.
- 55 Foss, P., Lewin, R.A. and Liaaen-Jensen, S. (1987) The carotenoids of *Prochloron* sp. (Prochlorophyta). *Phycologia* 26, 142–144.
- 56 Whithers, N.W., Alberte, R.S., Lewin, R.A., Thornber, J.P., Britton, G. and Goodwin, T.W. (1978) Photosynthetic unit size, carotenoids, and chlorophyll-protein composition of *Prochloron* sp., a prokaryotic green alga. *Proc. Natl. Acad. Sci. USA* 75, 2301–2305.
- 57 Goericke, R. and Repeta, D.J. (1992) The pigments of *Prochlorococcus marinus*: The presence of divinylchlorophyll *a* and *b* in a marine prokaryote. *Limnol. Oceanogr.* 37, 425–433.
- 58 Whithers, N.W., Vidaver, W. and Lewin, R.A. (1978) Pigment composition, photosynthesis and fine structure of a non-blue-green prokaryotic algal symbiont (*Prochloron* sp.) in a didemnid ascidian from Hawaiian waters. *Phycologia* 17, 167–171.
- 59 Bachmann, M., Maidhof, A., Schroeder, H.C., Pfeifer, K., Kurz, E.M., Rose, T., Mueller, I. and Mueller, W.E.G. (1985) *Prochloron* (Prochlorophyta): biochemical contributions to the chlorophyll and RNA composition. *Plant Cell Physiol.* 26, 1211–1222.
- 60 Alberte, R.S., Cheng, L. and Lewin, R.A. (1986) Photosynthetic characteristics of *Prochloron* sp./ascidian symbioses. *Mar. Biol.* 90, 575–587.
- 61 Burger Wiersma, T. and Post, A.F. (1989) Functional analysis of the photosynthetic apparatus of *Prochlorothrix hollandica* (Prochlorales), a chlorophyll *b* containing prokaryote. *Plant Physiol.* 91, 770–774.
- 62 Melis, A. and Anderson, J.M. (1983) Structural and functional organization of the photosystems in spinach chloroplasts. Antenna size, relative electron transport capacity and chlorophyll composition. *Biochim. Biophys. Acta* 724, 473–484.
- 63 Goodwin, T.W. and Britton, G. (1988) Distribution and analysis of carotenoids. in: *Plant Pigments* (Goodwin, T.W., Ed.), Academic Press Ltd., pp. 61–131.
- 64 Demmig-Adams, B. (1990) Carotenoids and photoprotec-

- tion in plants: a role for the xanthophyll zeaxanthin. *Biochim. Biophys. Acta* 1020, 1–24.
- 65 Schuster, G., Owens, G.C., Cohen, Y. and Ohad, I. (1984) Thylakoid polypeptide composition and light-independent phosphorylation of the chlorophyll *a/b*-protein in *Prochloron*, a prokaryote exhibiting oxygenic photosynthesis. *Biochim. Biophys. Acta* 767, 596–605.
- 66 Hiller, R.G. and Larkum, A.W.D. (1985) The chlorophyll–protein complexes of *Prochloron* sp. (Prochlorophyta). *Biochim. Biophys. Acta* 806, 107–115.
- 67 Bullerjahn, G.S., Matthijs, H.C.P., Mur, L.R. and Sherman, L.A. (1987) Chlorophyll–protein composition of the thylakoid membrane from *Prochlorothrix hollandica*, a prokaryote containing chlorophyll *b*. *Eur. J. Biochem.* 168, 295–300.
- 68 Post, A.F., Gal, A., Ohad, I., Milbauer, K.M. and Bullerjahn, G.S. (1992) Characterization of light-activated reversible phosphorylation of a chlorophyll *a/b* antenna apoprotein in the photosynthetic prokaryote *Prochlorothrix hollandica*. *Biochim. Biophys. Acta* 1100, 75–82.
- 69 Hemelrijk, P.W., Kwa, S.L.S., Van Grondelle, R. and Dekker, J.P. (1991) Spectroscopic properties of LHC-II, the main light-harvesting chlorophyll *a/b* protein complex from chloroplast membranes. *Biochim. Biophys. Acta* 1098, 159–166.
- 70 Matthijs, H.C.P., Van Der Staay, G.W.M., Van Amerongen, H., Van Grondelle, R. and Garab, G. (1989) Structural organization of chlorophyll *b* in the Prochlorophyte *Prochlorothrix hollandica*. *Biochim. Biophys. Acta* 975, 185–187.
- 71 Milbauer, K.M. and Bullerjahn, G.S. (1991) Metabolism and phosphorylation of the chlorophyll *a/b* binding light harvesting antenna of *Prochlorothrix hollandica*. *Proc. VII Int. Symp. Photosynthetic Prokaryotes*, p. 149.
- 72 Post, A.F., Bullerjahn, G.S. and Ohad, I. (1991) Regulation of the effective absorption cross-section of PSII in *Prochlorothrix hollandica*. *Proc. VII Int. Symp. Photosynthetic Prokaryotes*, p. 82.
- 73 Post, A.F., Ohad, I., Warner, K.M. and Bullerjahn, G.S. (1993) Energy distribution between PS I and PS II in the photosynthetic prokaryote *Prochlorothrix hollandica* involves a chlorophyll *a/b* antenna associated with PS I. *Biochim. Biophys. Acta*, in press.
- 74 Van Der Staay, G.W.M., Brouwer, A., Baard, R.L., Van Mourik, F. and Matthijs, H.C.P. (1992) Separation of photosystems I and II from the oxychlorobacterium (Prochlorophyte) *Prochlorothrix hollandica* and association of chlorophyll *b* binding antenna with photosystem II. *Biochim. Biophys. Acta* 1102, 220–228.
- 75 Bassi, R., Soen, S.Y., Frank, G., Zuber, H. and Rochaix, J.-D. (1992) Characterization of chlorophyll *a/b* proteins of photosystem I in *Chlamydomonas reinhardtii*. *J. Biol. Chem.* 267, 25714–25721.
- 76 Van Der Staay, G.W.M., Matthijs, H.C.P. and Mur, L.R. (1989) Phosphorylation and dephosphorylation of membrane proteins from the Prochlorophyte *Prochlorothrix hollandica* in fixed redox states. *Biochim. Biophys. Acta* 975, 317–324.
- 77 Matthijs, H.C.P., Reith, H. and Van Der Staay, G.W.M. (1990) Separation of PS I and PS II from the Prochlorophyte (oxychlorobacterium) *Prochlorothrix hollandica* and the role of chl *b*. In: *Current Research in Photosynthesis* (Baltscheffsky, M., Ed.), Vol. II, pp. 201–204. Kluwer Academic Publishers, Dordrecht.
- 78 Staehelin, L.A. (1986) Chloroplast structure and supramolecular organization of photosynthetic membranes. In: *Encyclopedia of Plant Physiology*, Vol. 19, *Photosynthesis III* (Staehelin, L.A. and Arntzen, C.J., Eds.), pp. 1–84. Springer Verlag, Berlin.
- 79 Green, B.A., Allred, D.R., Morishige, D.T. and Staehelin, L.A. (1988) Hierarchical response of light-harvesting chlorophyll-proteins in a light-sensitive chlorophyll *b* deficient mutant of maize. *Plant Physiol.* 87, 357–364.
- 80 Van Der Staay, G.W.M. (1992) Functional localization and properties of the chlorophyll *b* binding antennae in the Prochlorophyte *Prochlorothrix hollandica*. PhD thesis, University of Amsterdam, 98 pp.
- 81 Schuster, G., Nechustai, R., Nelson, N. and Ohad, I. (1985) Purification and composition of photosystem I reaction center of *Prochloron* sp., an oxygen-evolving prokaryote containing chlorophylls *b*. *FEBS Lett.* 191, 29–33.
- 82 Mor, T.S., Post, A.F. and Ohad, I. (1992) Characterization of the oxygen evolving complex of *Prochlorothrix hollandica*. In: *Regulation of Chloroplast Biogenesis* (Argyroudi, J.A., Ed.), pp. 433–437. Plenum Press, New York, NY.
- 83 Mor, T.S., Post, A.F. and Ohad, I. (1993) The manganese stabilising protein (MSP) of *Prochlorothrix hollandica* is a hydrophobic membrane-bound protein. *Biochim. Biophys. Acta* 1141, 206–212.
- 84 Ikeuchi, M., Eggers, B., Shen, G., Webber, A., Yu, J., Hirano, A., Inoue, Y. and Vermaas, W. (1991) Cloning of the *psbK* gene from *Synechocystis* PCC 6803 and characterization of photosystem II mutants lacking PSII-K.J. *Biol. Chem.* 266, 11111–11115.
- 85 Burger-Wiersma, T. and Matthijs, H.C.P. (1990) The biology of the Prochlorales. In: *Autotrophic Microbiology and One-Carbon Metabolism* (Codd, G.A. et al., Eds.), pp. 1–24. Kluwer Academic Publishers, Dordrecht.
- 86 Oren, A., Padan, E. and Malkin, S. (1979) Sulfide inhibition of photosystem II in cyanobacteria (blue-green algae) and tobacco chloroplasts. *Biochim. Biophys. Acta* 546, 270–279.
- 87 Arieli, B., Padan, E. and Shahak, Y. (1991) Sulfide-induced sulfide-quinone reductase activity in thylakoids of *Oscillatoria limnetica*. *J. Biol. Chem.* 266, 104–111.
- 88 Reference omitted.
- 89 Cohen, Y., Jørgensen, B.B., Revsbech, N.P. and Poplawski, R. (1986) Adaptation to hydrogen sulfide of oxygenic and anoxygenic photosynthesis among cyanobacteria. *Appl. Environ. Microbiol.* 51, 398–407.
- 90 Dubinsky, Z., Falkowski, P.G. and Wyman, K. (1986) Light harvesting and utilization by phytoplankton. *Plant Cell Physiol.* 27, 1335–1349.
- 91 Myers, J. and Graham, J.R. (1971) The photosynthetic

- unit in *Chlorella* measured by repetitive short flashes. *Plant Physiol.* 48, 282–286.
- 92 Ley, A.C. and Mauzerall, D.C. (1982) Absolute absorption cross-sections for photosystem II and the minimum quantum requirement for photosynthesis in *Chlorella vulgaris*. *Biochim. Biophys. Acta* 680, 95–106.
- 93 Post, A.F. and Romem, E. (1993) Characterization of two *Chlorella vulgaris* (Chlorophyceae) strains isolated from wastewater oxidation ponds. *J. Phycol.*, in press.
- 94 Post, A.F., De Wit, R. and Mur, L.R. (1985) Interactions between temperature and light intensity on the growth and photosynthesis of *Oscillatoria agardhii*. *J. Plankton Res.* 7, 487–495.
- 95 Post, A.F. (1986) Transient state characteristics of adaptation to changes in light conditions for the cyanobacterium *Oscillatoria agardhii*. I. Pigmentation and photosynthesis. *Arch. Microbiol.* 145, 353–357.
- 96 Partensky, F., Hoepffner, N., Li, W.K.W., Ulloa, O. and Vault, D. (1993) Photoacclimation of *Prochlorococcus* sp. (Prochlorophyta) strains isolated from the North Atlantic and the Mediterranean Sea. *Plant Physiol.* 101, 285–296.
- 97 Alberte, R.S., Cheng, L. and Lewin, R.A. (1986) Photosynthetic characteristics of *Prochloron* sp./ascidian symbioses. *Mar. Biol.* 90, 575–587.
- 98 Olson, R.J., Chisholm, S.W., Zettler, E.R., Altabet, M.A. and Dusenberry, J.A. (1990) Spatial and temporal distributions of Prochlorophyte picoplankton in the North Atlantic Ocean. *Deep Sea Res.* 37, 1033–1051.
- 99 Veldhuis, M.J.W. and Kraay, G.W. (1990) Vertical distribution and pigment composition of a picoplanktonic Prochlorophyte in the subtropical North-Atlantic: a combined study of HPLC-analysis of pigments and flow cytometry. *Mar. Ecol. Prog. Ser.* 68, 121–127.
- 100 Mor, T.S., Post, A.F. and Ohad, I. (1992) *Prochlorothrix hollandica* is more sensitive to photoinhibition than *Chlamydomonas reinhardtii*. In: *Regulation of Chloroplast Biogenesis* (Argyroudi, J.A., Ed.), pp. 427–433. Plenum Press, New York, NY.
- 101 Bennett, J. (1991) Protein phosphorylation in green plant chloroplasts. *Ann. Rev. Plant Physiol. Plant Mol. Biol.* 42, 281–311.
- 102 Allen, J.F. (1992) Protein phosphorylation in regulation of photosynthesis. *Biochim. Biophys. Acta* 1098, 275–335.
- 103 Williams, W.P. and Allen, J.F. (1987) State 1/State 2 changes in higher plants and algae. *Photosynthesis Res.* 13, 19–45.
- 104 Biggins, J. and Bruce, D. (1989) Regulation of excitation energy transfer in organisms containing phycobilins. *Photosynthesis Res.* 20, 1–34.
- 105 Matthijs, H.C.P., Burger-Wiersma, T. and Mur, L.R. (1989) Status report on *Prochlorothrix hollandica*, a free-living Prochlorophyte. In: *Prochloron*, a Microbial Enigma (Lewin, R.A. and Cheng, L., Eds.), pp. 83–87. Chapman and Hall, New York, NY.
- 106 Critchley, C. and Andrews, T.J. (1984) Photosynthesis and plasmamembrane permeability properties of *Prochloron*. *Arch. Microbiol.* 138, 247–250.
- 107 Kal, B.F.M., Engelen, G.B. and Cappenberg, Th.E. (1984) Loosdrecht lakes restoration project: Hydrology and physico-chemical characteristics of the lakes. *Verh. int. Ver. Limnol.* 22, 835–841.
- 108 Meuleman, A.F.M. and Sinke, A.J.C. (1992) The role of sulfate reduction in the decomposition of organic material. *The Utrecht Plant Ecol. Rep.* 10, 23–38.
- 109 Van Liere, L., Breebaart, L. and Dullemont, Y.J. (1989) Determining the relative number of Prochlorophytes in lake phytoplankton using epifluorescence microscopy. *Br. Phycol. J.* 24, 391–394.
- 110 Mur, L.R., Gons, H.J. and Van Liere, L. (1978) Competition of the green alga *Scenedesmus* and the blue-green alga *Oscillatoria*. *Mitt. Internat. Verein. Limnol.* 21, 473–479.
- 111 Post, A.F., Loogman, J.G. and Mur, L.R. (1986) Photosynthesis, carbon flows and growth of *Oscillatoria agardhii* in environments with a periodic supply of light energy. *J. Gen. Microbiol.* 132, 2129–2136.
- 112 Jones, R.I. (1977) Factors controlling phytoplankton production and succession in a highly eutrophic lake (Kinnego Bay, Lough Neagh). III. Interspecific competition in relation to irradiance and temperature. *J. Ecol.* 65, 579–586.
- 113 Harris, G.P. (1978) Photosynthesis, productivity and growth: the ecological physiology of phytoplankton. *Erg. Limnol.* 10, 1–171.
- 114 Van Liere, L. and Mur, L.R. (1979) Growth kinetics of *Oscillatoria agardhii* Gom. in continuous culture, limited in its growth by the light energy supply. *J. Gen. Microbiol.* 155, 153–160.
- 115 Li, W.G.W. and Wood, M. (1988) Vertical distribution of North Atlantic ultraplankton: analysis by flow cytometry and epifluorescence microscopy. *Deep Sea Res.* 35, 1615–1638.
- 116 Li, W.K.W., Dickie, P.M., Irwin, B.D. and Wood, A.M. (1992) Biomass of bacteria, cyanobacteria, Prochlorophytes and photosynthetic eukaryotes in the Sargasso Sea. *Deep Sea Res.* 39, 501–519.
- 117 Vault, D., Partensky, F., Neveux, J., Mantoura, R. and Llewellyn, C. (1990) Wintertime presence of Prochlorophytes in surface waters of the North-Western Mediterranean Sea. *Limnol. Oceanogr.* 35, 1156–1164.
- 118 Veldhuis, M.J.W. and Kraay, G.W. (1993) Cell abundance and fluorescence of picoplankton in relation to growth irradiance and nitrogen availability in the Red Sea. *Netherlands J. Sea Res.* 31, 135–145.
- 119 Chavez, F.P., Buck, K., Coale, K., Martin, J.H., DiTullio, G.R., Welschmeyer, N.A., Jacobson, A.C. and Barber, R.T. (1991) Growth rates, grazing, sinking and iron limitation of equatorial Pacific phytoplankton. *Limnol. Oceanogr.* 36, 1816–1833.
- 120 Everitt, D.A., Wright, S.W., Volkman, J.K., Thomas, D.P. and Lindstrom, E.J. (1990) Phytoplankton community compositions in the western equatorial Pacific determined from chlorophyll and carotenoid pigment distributions. *Deep Sea Res.* 37, 975–997.
- 121 Campbell, L. and Vault, D. (1994) Photosynthetic pi-

- coplankton community structure in the subtropical North Pacific Ocean near Hawaii (station ALOHA). *Deep Sea Res.*, in press.
- 122 Gieskes, W.W.C., Kraay, G.W., Nontji, A., Setiapermana, D. and Sutomo (1988) Monsoonal alternation of a mixed and a layered structure in the phytoplankton of the euphotic zone of the Banda Sea (Indonesia): A mathematical analysis of algal pigment fingerprints. *Neth. J. Sea Res.* 22, 123–137.
- 123 Veldhuis, M.J.W., Kraay, G.W. and Gieskes, W.W.C. (1993) Growth and fluorescence characteristics on a north-south transect in the eastern North-Atlantic. *Deep Sea Res.* 40, 609–626.
- 124 Campbell, L. and Iturriaga, R. (1988) Identification of *Synechococcus* spp. in the Sargasso Sea by immunofluorescence and fluorescence excitation spectroscopy performed on individual cells. *Limnol. Oceanogr.* 33, 1196–1201.
- 125 Ong, L.J., Glazer, A.N. and Waterbury, J.B. (1984) An unusual phycoerythrin from a marine cyanobacterium. *Science* 224, 80–83.
- 126 Morel, A., Ahn Y.-H., Partensky, F., Vaulot, D. and Claustre, H. (1993) *Prochlorococcus* and *Synechococcus*: a comparative study of their optical properties in relation to their size and pigmentation. *J. Mar. Res.* 51, 617–649.
- 127 Vaulot, D. and Partensky, F. (1992) Cell cycle distributions of Prochlorophytes in the north western Mediterranean Sea. *Deep Sea Res.* 39, 727–742.
